# Supplementary material for: Differential retention of transposable element-derived sequences in outcrossing Arabidopsis genomes
Source: PubMed Central journal article supplement (PMC6636163; doi:10.1186/s13100-019-0171-6), 2019-07-17
Supplement: 13100_2019_171_MOESM1_ESM.pdf [file 13100_2019_171_MOESM1_ESM.pdf]

| Library type      | Library fragment size | Read size           | # of reads (after filtering) |
|-------------------|-----------------------|---------------------|------------------------------|
| PE <sup>1,2</sup> | 550 bp                | 301 bp              | 43,347,614                   |
| PE <sup>1,3</sup> | 350 bp                | 101 bp              | 31,177,878                   |
| PE <sup>2</sup>   | 500 bp                | 301 bp              | 34,566,750                   |
| MP <sup>1,2</sup> | 4 kb                  | 301 bp              | 6,999,466                    |
| MP <sup>2</sup>   | 6 kb                  | 301 bp              | 3,761,466                    |
| MP <sup>2</sup>   | 10 kb                 | 301 bp              | 3,401,790                    |
| PACBIO            | /                     | 3.3 kb <sup>4</sup> | 1,390,999 <sup>5</sup>       |

<sup>1</sup>Libraries produced and sequenced by [40].

<sup>2</sup> Sequenced in a MiSeq Illumina sequencer (Illumina, California, United States)

<sup>3</sup> Sequenced in a HiSeq2000 Illumina sequencer (Illumina, California, United States)

<sup>4</sup> mean subread length

<sup>5</sup> no filtering
