# Supplementary material for: Differential retention of transposable element-derived sequences in outcrossing Arabidopsis genomes
Source: PubMed Central journal article supplement (PMC6636163; doi:10.1186/s13100-019-0171-6), 2019-07-17
Supplement: 13100_2019_171_MOESM2_ESM.pdf [file 13100_2019_171_MOESM2_ESM.pdf]

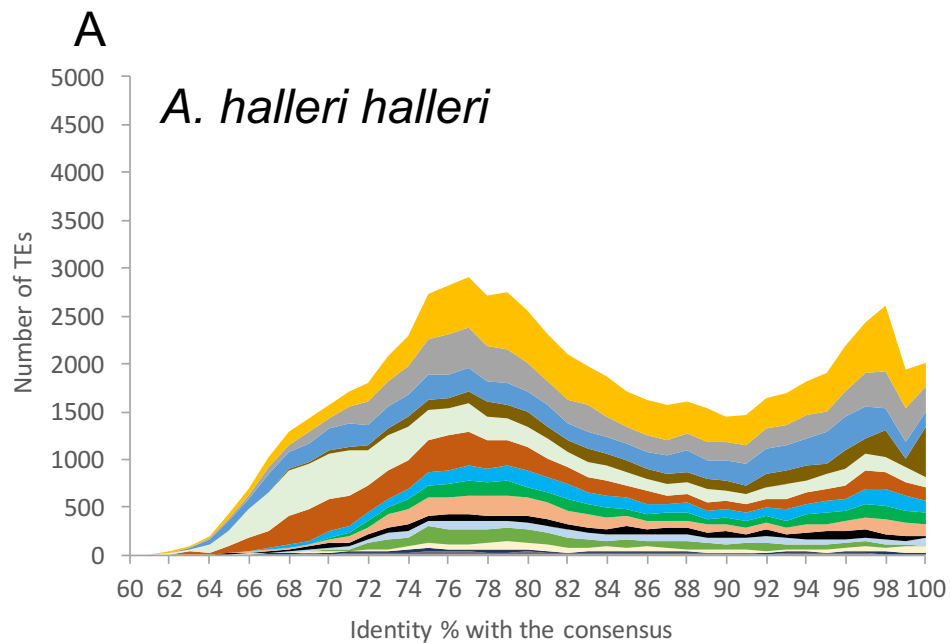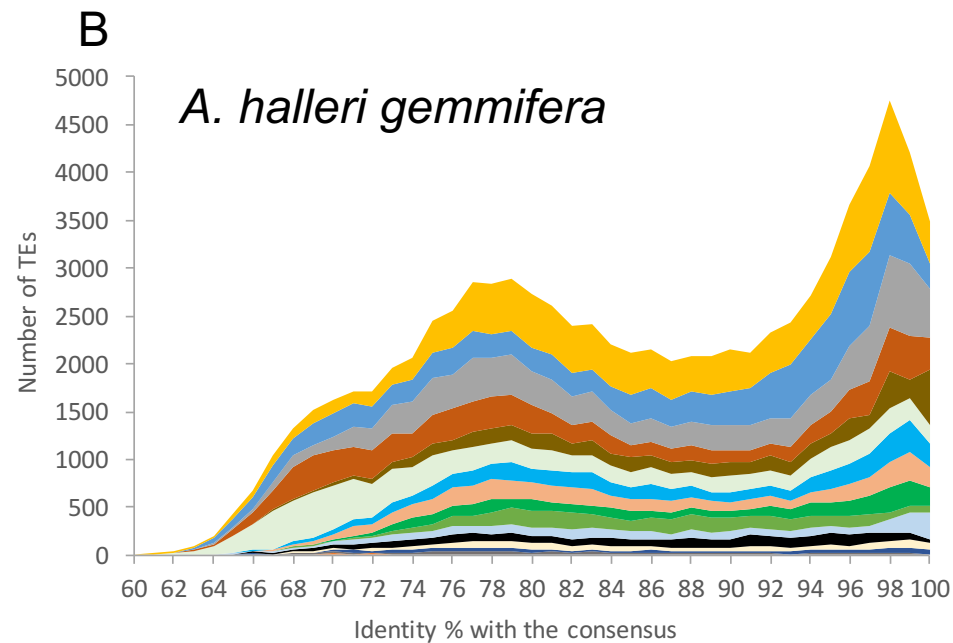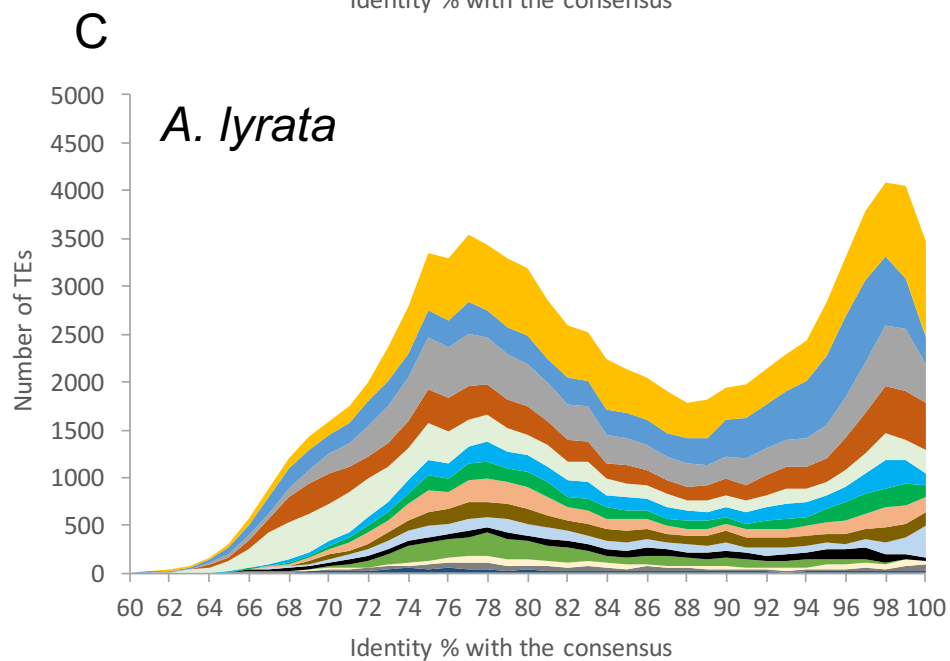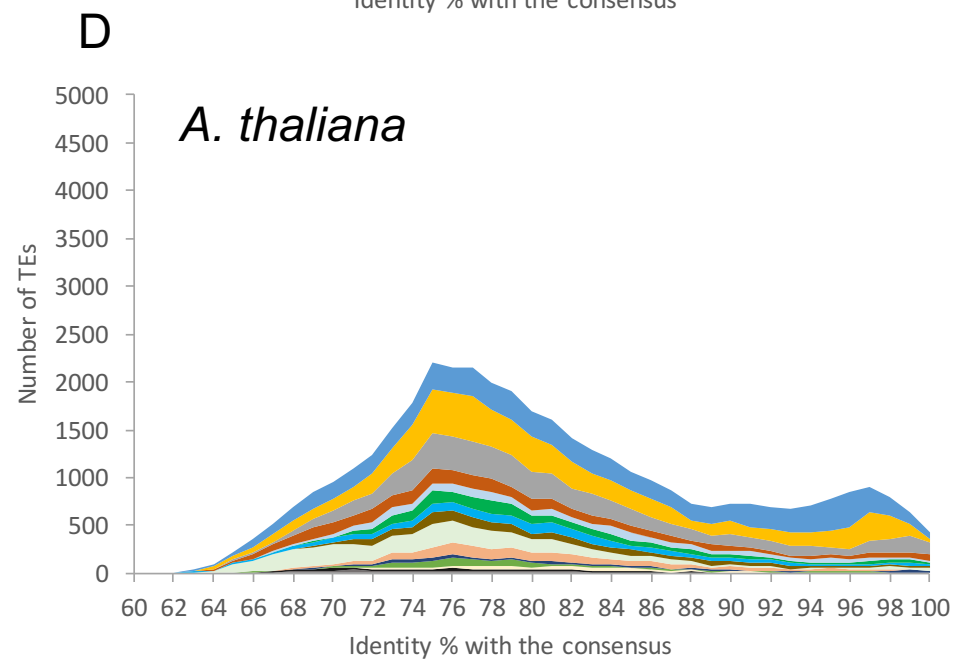

■ Retrotransposon 
 ■ Chimeric 
 ■ Transposase 
 ■ TRIM\_LARD 
 ■ SINE 
 ■ CACTA 
 ■ Mariner 
 ■ Non auton. 
 ■ MITE 
 ■ hAT 
 ■ LINE 
 ■ Harbinger 
 ■ Copia 
 ■ MuDR 
 ■ Gypsy 
 ■ Helitron
