# Supplementary material for: Differential retention of transposable element-derived sequences in outcrossing Arabidopsis genomes
Source: PubMed Central journal article supplement (PMC6636163; doi:10.1186/s13100-019-0171-6), 2019-07-17
Supplement: 13100_2019_171_MOESM3_ESM.pdf [file 13100_2019_171_MOESM3_ESM.pdf]

---

| Pairwise comparison       | <i>A. halleri gemmifera</i> vs <i>A. lyrata</i> |
|---------------------------|-------------------------------------------------|
| Total orthologous TEs     | 7,700                                           |
| Old orthologous TEs       | 6,639                                           |
| Young orthologous TEs     | 1,061                                           |
| Total non-orthologous TEs | 81,893                                          |
| Old non-orthologous TEs   | 46,519                                          |
| Young non-orthologous TEs | 35,374                                          |

---
