# Supplementary material for: Differential retention of transposable element-derived sequences in outcrossing Arabidopsis genomes
Source: PubMed Central journal article supplement (PMC6636163; doi:10.1186/s13100-019-0171-6), 2019-07-17

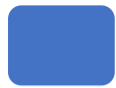

gene

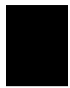

TE

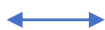

gene orthology  
relationship

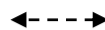

TE orthology  
relationship

*Genome X*

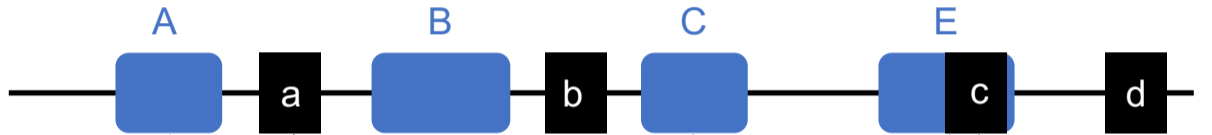

*Genome Y*

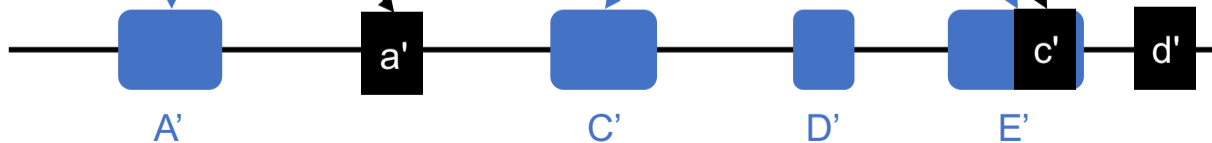

Supplement: 13100_2019_171_MOESM6_ESM.pdf [file 13100_2019_171_MOESM6_ESM.pdf]
